# Supplementary material
Source: publisher figshare collection journal article supplement (https://frontiersin.figshare.com/ndownloader/files/18600266)
Supplement: Supplementary file [file 18600266]

**Supplementary Table 1. *O*- and *N*-methyltransferases show to accept BIA substrates in vitro, which have been characterized at the molecular level.** Specificity refers to regiospecificity (2,6,7,9,3',4'), stereospecificity [(*R*) or (*S*)] and to the number of pre-existing bonds on the nitrogen atom (2'*N*, 3'*N*). † represents features not conclusively demonstrated, ‡ represents activities that have been demonstrated but are quite minor or weak, "*nd*" indicates that no activities have been detected and "not tested" indicates that no *in vitro* assays were performed. Positions denoted by numbering scheme are presented visually in Supplementary Figures 4 and 5. For enzymes with many reported substrates, minor activities are not listed.

| Plant species             | Short name       | Enzyme full name                                                         | Genbank ID             | <i>In vitro</i> substrate(s)                                                                                                                                                                                                              | Specificity                            | Functional evidence <i>in planta</i>                                                                                                                  | Reference(s)                                                                           |
|---------------------------|------------------|--------------------------------------------------------------------------|------------------------|-------------------------------------------------------------------------------------------------------------------------------------------------------------------------------------------------------------------------------------------|----------------------------------------|-------------------------------------------------------------------------------------------------------------------------------------------------------|----------------------------------------------------------------------------------------|
| <i>Glaucium flavum</i>    | GfIOMT1          | <i>O</i> -methyltransferase 1                                            | KP176693               | ( <i>R,S</i> )-Norlaundanosoline<br>( <i>R,S</i> )-6- <i>O</i> -Methylnorlaundanosoline<br>( <i>R,S</i> )-6- <i>O</i> -Methylaudanosoline<br>( <i>R,S</i> )-Tetrahydrocolumbamine<br>( <i>S</i> )-Reticuline<br>( <i>R,S</i> )-Scoulerine | 6,7,3',4'                              | High expression in stem & flower bud correlating with accumulation of glaucine                                                                        | Chang <i>et al.</i> , 2015                                                             |
|                           | GfIOMT2          | <i>O</i> -methyltransferase 2                                            | KP176694               | ( <i>R,S</i> )-Norlaundanosoline<br>( <i>R,S</i> )-Scoulerine<br>( <i>R,S</i> )-Tetrahydrocolumbamine<br>( <i>S</i> )-Reticuline                                                                                                          | 6,3',4'                                | High expression in root tissue                                                                                                                        | Chang <i>et al.</i> , 2015                                                             |
|                           | GfIOMT3          | <i>O</i> -methyltransferase 3                                            | KP176695               | <i>nd</i>                                                                                                                                                                                                                                 |                                        | Very low expression in all tissues                                                                                                                    | Chang <i>et al.</i> , 2015                                                             |
|                           | GfIOMT4          | <i>O</i> -methyltransferase 4                                            | KP176696               | <i>nd</i>                                                                                                                                                                                                                                 |                                        | Moderate expression level in all tissues examined                                                                                                     | Chang <i>et al.</i> , 2015                                                             |
|                           | GfIOMT5          | <i>O</i> -methyltransferase 5                                            | KP176697               | <i>nd</i>                                                                                                                                                                                                                                 |                                        | Moderate expression level in stem tissue, all others low                                                                                              | Chang <i>et al.</i> , 2015                                                             |
|                           | GfIOMT6          | <i>O</i> -methyltransferase 6                                            | KP176698               | ( <i>R,S</i> )-Scoulerine<br>( <i>S</i> )-Reticuline<br>( <i>R,S</i> )-Tetrahydrocolumbamine<br>( <i>R,S</i> )-Norreticuline                                                                                                              | 2,9<br>7,3'                            | High expression in root, leaf and flower bud tissues                                                                                                  | Chang <i>et al.</i> , 2015                                                             |
|                           | GfIOMT7          | <i>O</i> -methyltransferase 7                                            | KP176699               | ( <i>R,S</i> )-Scoulerine<br>( <i>R,S</i> )-Tetrahydrocolumbamine                                                                                                                                                                         | 2,9                                    | Moderate expression level in root, stem and flower bud tissues                                                                                        | Chang <i>et al.</i> , 2015                                                             |
|                           | GfINMT1          | Coclaurine <i>N</i> -methyltransferase                                   |                        | ( <i>S</i> )-Coclaurine<br>Heliamine                                                                                                                                                                                                      | 2' <i>N</i>                            |                                                                                                                                                       | Hagel <i>et al.</i> , 2015b                                                            |
|                           | GfINMT2 (GfTNMT) | Tetrahydroprotoberberine <i>N</i> -methyltransferase                     |                        | ( <i>R,S</i> )-Stylopine<br>( <i>S</i> )-Canadine                                                                                                                                                                                         |                                        |                                                                                                                                                       | Hagel <i>et al.</i> , 2015b                                                            |
|                           | GfINMT3          | <i>N</i> -methyltransferase 3                                            |                        | ( <i>S</i> )-Reticuline<br>( <i>R,S</i> )-Stylopine                                                                                                                                                                                       | 3' <i>N</i>                            |                                                                                                                                                       | Hagel <i>et al.</i> , 2015b                                                            |
|                           | GfINMT4          | <i>N</i> -methyltransferase 4                                            |                        | ( <i>S</i> )-Coclaurine<br>( <i>S</i> )-Reticuline                                                                                                                                                                                        | 2' <i>N</i> , 3' <i>N</i>              |                                                                                                                                                       | Hagel <i>et al.</i> , 2015b                                                            |
|                           | GfINMT5          | <i>N</i> -methyltransferase 5                                            |                        | ( <i>S</i> )-Reticuline<br>( <i>S</i> )-Coclaurine                                                                                                                                                                                        | 3' <i>N</i> , 2' <i>N</i> <sup>†</sup> |                                                                                                                                                       | Hagel <i>et al.</i> , 2015b                                                            |
|                           | GfINMT6          | <i>N</i> -methyltransferase 6                                            |                        | ( <i>S</i> )-Coclaurine                                                                                                                                                                                                                   | 2' <i>N</i>                            |                                                                                                                                                       | Hagel <i>et al.</i> , 2015b                                                            |
| <i>Papaver somniferum</i> | Ps6OMT (PsOMT2)  | Norcoclaurine 6- <i>O</i> -methyltransferase                             | AY217335, AY268894     | ( <i>R,S</i> )-Norcoclaurine<br>( <i>R,S</i> )-Norprotosinomenine<br>Isorientaline                                                                                                                                                        | 6,7                                    | Majority of BIAs content reduced by VIGS knockdown                                                                                                    | Facchini & Park, 2003; Ounarooun <i>et al.</i> , 2003; Desgagné-Penix & Facchini, 2012 |
|                           | Ps7OMT (PsOMT1)  | Reticuline 7- <i>O</i> -methyltransferase                                | AY268893               | ( <i>R,S</i> )-Reticuline<br>( <i>R,S</i> )-Orientaline<br>( <i>R,S</i> )-Protosinomenine<br>( <i>R,S</i> )-Isoorientaline                                                                                                                | 6,7,4'<br><i>S</i> > <i>R</i>          | <i>N</i> -methylated BIAs (eg. laudanine) content reduced by VIGS knockdown; Morphinans and noscapine content increased by VIGS knockdown             | Ounarooun <i>et al.</i> , 2003; Desgagné-Penix & Facchini, 2012                        |
|                           | PsSOMT1          | Scoulerine-9- <i>O</i> -methyltransferase                                | JN185323               | ( <i>S</i> )-Scoulerine<br>( <i>S</i> )-Norreticuline<br>( <i>S</i> )-Reticuline                                                                                                                                                          | 9,2<br>3',7                            | Noscapine, papaverine and pathway intermediates decreased by VIGS knockdown; Transcript abundance correlates with noscapine accumulation in cultivars | Dang & Facchini, 2012                                                                  |
|                           | PsSOMT2          | <i>O</i> -methyltransferase 2                                            | JN185324               | ( <i>S</i> )-Scoulerine                                                                                                                                                                                                                   | 9                                      | Noscapine decreased by VIGS knockdown; Transcript abundance correlates with noscapine accumulation in cultivars                                       | Dang & Facchini, 2012                                                                  |
|                           | PsSOMT3          | <i>O</i> -methyltransferase 3                                            | JN185325               | ( <i>S</i> )-Scoulerine                                                                                                                                                                                                                   | 9                                      | Noscapine decreased by VIGS knockdown; Transcript abundance correlates with noscapine accumulation in cultivars                                       | Dang & Facchini, 2012                                                                  |
|                           | PsN7OMT          | Norreticuline 7- <i>O</i> -methyltransferase                             | FJ156103, XM_026575469 | ( <i>S</i> )-Norreticuline                                                                                                                                                                                                                | 7                                      | Transcript abundance correlates with papaverine accumulation in cultivars; Papaverine content reduced by VIGS knockdown                               | Pienkny <i>et al.</i> , 2009; Desgagné-Penix & Facchini, 2012                          |
|                           | Ps4'OMT1         | 3'-hydroxy- <i>N</i> -methylcoclaurine 4'- <i>O</i> -methyltransferase 1 | AY217333               | <i>Not tested</i>                                                                                                                                                                                                                         |                                        |                                                                                                                                                       | Facchini & Park, 2003                                                                  |

**Supplementary Table 1 (continued)**

| Plant species                            | Short name                   | Enzyme full name                                                                         | Genbank ID            | <i>In vitro</i> Substrate(s)                                                                                                                                                                                            | Specificity                            | Functional evidence <i>in planta</i>                                                                                                                                                                   | Reference(s)                                                                                                                      |
|------------------------------------------|------------------------------|------------------------------------------------------------------------------------------|-----------------------|-------------------------------------------------------------------------------------------------------------------------------------------------------------------------------------------------------------------------|----------------------------------------|--------------------------------------------------------------------------------------------------------------------------------------------------------------------------------------------------------|-----------------------------------------------------------------------------------------------------------------------------------|
| <i>Papaver somniferum</i><br>(continued) | Ps4'OMT2                     | 3'-hydroxy- <i>N</i> -methylcoclaurine 4'- <i>O</i> -methyltransferase 2                 | AY217334              | ( <i>R,S</i> )-3'-hydroxy- <i>N</i> -methylcanadine<br>( <i>R,S</i> )-laudanosoline<br>( <i>R,S</i> )-6- <i>O</i> -methylnorlaudanosoline<br>( <i>R,S</i> )-norlaudanosoline                                            | 4 <sup>+</sup>                         | Expression level correlates with known BIA biosynthesis genes 4'- <i>O</i> -methylcoclaurine and majority of BIAs content reduced by VIGS knockdown                                                    | Facchini & Park, 2003; Ziegler <i>et al.</i> , 2005; Desgagné-Penix & Facchini, 2012                                              |
|                                          | PsOMT2:<br>PsOMT3<br>dimer   | 4'- <i>O</i> -desmethyl-3- <i>O</i> -acetyl-papaveroxine 4'- <i>O</i> -methyltransferase | JN185324,<br>JN185325 | 4'- <i>O</i> -desmethyl-3- <i>O</i> -acetyl-papaveroxine<br>Narcotoline                                                                                                                                                 | 4'                                     | Narcotoline content increased by VIGS knockdown of OMT2; High narcotoline content in cultivar expressing inactive mutants OMT2b and OMT3b; Co-expression in yeast enables noscapine biosynthesis       | Park <i>et al.</i> , 2018; Li & Smolke, 2016                                                                                      |
|                                          | PsOMT2:<br>Ps6OMT<br>dimer   | 4'- <i>O</i> -desmethyl-3- <i>O</i> -acetyl-papaveroxine 4'- <i>O</i> -methyltransferase | JN185324,<br>AY217335 | 4'- <i>O</i> -desmethyl-3- <i>O</i> -acetyl-papaveroxine<br>Narcotoline                                                                                                                                                 | 4'                                     | Narcotoline content increased by VIGS knockdown of OMT2; High narcotoline content in cultivar expressing inactive mutants OMT2b and OMT3b; Co-expression in yeast enables noscapine biosynthesis       | Park <i>et al.</i> , 2018; Li & Smolke, 2016                                                                                      |
|                                          | PsOMT2b:<br>PsOMT3b<br>dimer |                                                                                          | MH029293,<br>MH029295 | <i>nd</i>                                                                                                                                                                                                               |                                        |                                                                                                                                                                                                        | Park <i>et al.</i> , 2018                                                                                                         |
|                                          | PsCNMT                       | Coclaurine <i>N</i> -methyltransferase                                                   | AY217336              | <i>Not tested</i>                                                                                                                                                                                                       |                                        | N-desmethylated BIA content increased by VIGS knockdown; Induction following elicitor treatment correlates with known BIA biosynthesis enzymes; Expression in yeast enables BIA biosynthesis (various) | Facchini & Park, 2003; Desgagné-Penix & Facchini, 2012; Fossati <i>et al.</i> , 2014; Trenchard & Smolke, 2015; Li & Smolke, 2016 |
|                                          | PsTNMT                       | Tetrahydroprotoberberine <i>N</i> -methyltransferase                                     | Q108P1                | ( <i>R,S</i> )-Canadine<br>( <i>R,S</i> )-Stylophine<br>( <i>R,S</i> )-Tetrahydropalmatine                                                                                                                              |                                        | Induction following elicitor treatment correlates with known BIA biosynthesis enzymes; Protein level correlates with protoberberine accumulation in <i>P. somniferum</i> tissues                       | Liscombe & Facchini, 2007                                                                                                         |
|                                          | PsRNMT                       | Reticuline <i>N</i> -methyltransferase                                                   | KX369612              | ( <i>R</i> )- and ( <i>S</i> )-Reticuline<br>( <i>S</i> )-Bulbocapnine<br>( <i>S</i> )-Corytuberine<br>( <i>S</i> )-Glaucine<br>Tetrahydropapaverine<br>Noscapine                                                       | <i>R</i> > <i>S</i>                    | Magnoflorine content reduced and corytuberine content increased by VIGS knockdown                                                                                                                      | Morris & Facchini, 2016                                                                                                           |
| <i>Coptis japonica</i>                   | PsNMT4                       |                                                                                          | KX369613              | <i>nd</i>                                                                                                                                                                                                               |                                        |                                                                                                                                                                                                        | Morris & Facchini, 2016                                                                                                           |
|                                          | Cj6OMT                       | Norcoclaurine 6- <i>O</i> -methyltransferase                                             | D29811                | ( <i>S</i> )- and ( <i>R</i> )-Norcoclaurine<br>( <i>R,S</i> )-Norlaudanosoline<br>( <i>R,S</i> )-Laudanosoline<br>( <i>S</i> )-Scoulerine<br>( <i>S</i> )- and ( <i>R</i> )-Coclaurine<br>( <i>R,S</i> )-Laudanosoline | 6 <sup>+</sup>                         | Overexpression in <i>E. californica</i> cells substantially increases BIA content                                                                                                                      | Morishige <i>et al.</i> , 2000; Tamura <i>et al.</i> , 2006                                                                       |
|                                          | Cj4'OMT                      | 3'-hydroxy- <i>N</i> -methyl-coclaurine 4'- <i>O</i> -methyltransferase                  | D29812                | ( <i>R,S</i> )-Norlaudanosoline<br>( <i>R,S</i> )-6- <i>O</i> -Methylnorlaudanosoline<br>( <i>S</i> )- and ( <i>R,S</i> )-Scoulerine<br>( <i>R,S</i> )-Reticuline                                                       | 4 <sup>+</sup>                         |                                                                                                                                                                                                        | Morishige <i>et al.</i> , 2000                                                                                                    |
|                                          | CjSOMT<br>(CjSMT)            | Scoulerine 9- <i>O</i> -methyltransferase                                                | D29809                | ( <i>S</i> )- and ( <i>R,S</i> )-Scoulerine<br>( <i>R,S</i> )-Tetrahydroxyprotoberberine<br>( <i>R,S</i> )-Norreticuline<br>( <i>R,S</i> )-norlaudanosoline                                                             | 9 <sup>+</sup><br>7 or 3 <sup>+</sup>  | Overexpression in <i>E. californica</i> cells enhanced production of <i>O</i> -methylated protoberberines                                                                                              | Takeshita <i>et al.</i> , 1995; Morishige <i>et al.</i> , 2000; Takemura <i>et al.</i> , 2010                                     |
|                                          | CjCoOMT                      | Columbamine <i>O</i> -methyltransferase                                                  | AB073908              | Columbamine<br>( <i>S</i> )- and ( <i>R,S</i> )-Scoulerine<br>( <i>R,S</i> )-Tetrahydroxyprotoberberine                                                                                                                 | 2, other                               |                                                                                                                                                                                                        | Morishige <i>et al.</i> , 2002                                                                                                    |
|                                          | CjCNMT                       | Coclaurine <i>N</i> -methyltransferase                                                   | AB061863              | ( <i>R</i> )- and ( <i>S</i> )-Coclaurine<br>6,7-Dimethoxyl-1,2,3,4-tetrahydroisoquinoline<br>( <i>R,S</i> )-Noreticuline<br>( <i>R,S</i> )-6- <i>O</i> -Methylnorlaudanosoline<br>( <i>R,S</i> )-Norlaudanosoline      | 2' <i>N</i> , 3' <i>N</i> <sup>+</sup> | Expression in <i>E. coli</i> enables reticuline biosynthesis; Expression in yeast enables magnoflorine biosynthesis                                                                                    | Choi <i>et al.</i> , 2002; Minami <i>et al.</i> , 2008                                                                            |
| <i>Coptis chinensis</i>                  | Cc6OMT1                      | 6- <i>O</i> -methyltransferase 1                                                         | MH165875              | ( <i>S</i> )-Norcoclaurine                                                                                                                                                                                              | 6, 7                                   | Transcript abundance correlates with alkaloid accumulation in tissues                                                                                                                                  | He <i>et al.</i> , 2018                                                                                                           |
|                                          | Cc6OMT2                      | 6- <i>O</i> -methyltransferase 2                                                         | MH165876              | ( <i>S</i> )-Norcoclaurine                                                                                                                                                                                              | 6, 7                                   | Transcript abundance correlates with alkaloid accumulation in tissues                                                                                                                                  | He <i>et al.</i> , 2018                                                                                                           |

**Supplementary Table 1 (continued)**

| Plant species                   | Short name                    | Enzyme full name                                                       | Genbank ID | <i>In vitro</i> Substrate(s)                                                                                                                                                                    | Specificity               | Functional evidence <i>in planta</i>                                                                                               | Reference(s)                                                    |
|---------------------------------|-------------------------------|------------------------------------------------------------------------|------------|-------------------------------------------------------------------------------------------------------------------------------------------------------------------------------------------------|---------------------------|------------------------------------------------------------------------------------------------------------------------------------|-----------------------------------------------------------------|
| <i>Coptis teeta</i>             | Ct6/7OMT                      | Norcoclaurine 7- <i>O</i> -methyltransferase                           | MH165877   | ( <i>S</i> )-Norcoclaurine                                                                                                                                                                      | 6,7                       |                                                                                                                                    | He <i>et al.</i> , 2018                                         |
|                                 | CtSOMT                        | Scoulerine 9- <i>O</i> -methyltransferase                              | MH165874   | ( <i>S</i> )-Scoulerine                                                                                                                                                                         | 9                         | Transcript abundance correlates with alkaloid accumulation in tissues                                                              | He <i>et al.</i> , 2018                                         |
| <i>Eschscholzia californica</i> | Ec7OMT                        | Reticuline 7- <i>O</i> -methyltransferase                              | AB232153   | ( <i>S</i> )-Reticuline<br>( <i>S</i> )-Norreticuline<br>( <i>S</i> )-Scoulerine<br>( <i>S</i> )-6- <i>O</i> -Methylnorlaudanoline<br>( <i>S</i> )-Laudanosoline                                | 7<br>7,3'<br>2            |                                                                                                                                    | Fujii <i>et al.</i> , 2007;<br>Purwanto <i>et al.</i> , 2017    |
|                                 | EcS/ROMT (G3OMT)              | Scoulerine/reticuline <i>O</i> -methyltransferase                      | LC171865   | ( <i>S</i> )-Reticuline<br>( <i>S</i> )-Norreticuline<br>( <i>S</i> )-Scoulerine                                                                                                                | 7,3'<br>9,2               | Expression in yeast enables biosynthesis of chelerythrine; Highly expressed in high macarpine <i>E. californica</i> cell line A5-1 | Purwanto <i>et al.</i> , 2017                                   |
|                                 | EcG2OMT                       |                                                                        | LC171866   | <i>not tested</i>                                                                                                                                                                               |                           |                                                                                                                                    | Purwanto <i>et al.</i> , 2017                                   |
|                                 | EcG11OMT                      | 10-hydroxy-dihydrosanguinarine 10- <i>O</i> -methyltransferase         | LC171864   | 10-Hydroxydihydrosanguinarine <sup>†</sup>                                                                                                                                                      | 10 <sup>†</sup>           |                                                                                                                                    | Purwanto <i>et al.</i> , 2017;<br>Purwanto, 2017                |
|                                 | EcTNMT                        | Tetrahydroprotoberberine <i>N</i> -methyltransferase                   | EU882977   | ( <i>R,S</i> )-Stylopine<br>( <i>R,S</i> )-Tetrahydropalmatine<br>( <i>R,S</i> )-Canadine<br>( <i>S</i> )-Scoulerine                                                                            |                           | Transcript expression induced by elicitor treatment of cell culture                                                                | Liscombe <i>et al.</i> , 2009                                   |
| <i>Thalictrum flavum</i>        | Tf6OMT                        | Norcoclaurine 6- <i>O</i> -methyltransferase                           | AY610507   | Norlaudanoline                                                                                                                                                                                  |                           | Cellular localization of transcripts correlates with known BIA genes in berberine accumulating organs                              | Samanani <i>et al.</i> , 2005;<br>Robin <i>et al.</i> , 2016    |
|                                 | Tf4'OMT                       | 3'-hydroxy- <i>N</i> -methylcoclaurine 4'- <i>O</i> -methyltransferase | AY610510   | <i>Not tested</i>                                                                                                                                                                               |                           | Cellular localization of transcripts correlates with known BIA genes in berberine accumulating organs                              | Samanani <i>et al.</i> , 2005                                   |
|                                 | TfSOMT                        | Scoulerine 9- <i>O</i> -methyltransferase                              | AY610512   | <i>Not tested</i>                                                                                                                                                                               |                           | Cellular localization of transcripts correlates with known BIA genes in berberine accumulating organs                              | Samanani <i>et al.</i> , 2005                                   |
|                                 | TfCNMT                        | Coclaurine <i>N</i> -methyltransferase                                 | AY610508   | ( <i>R,S</i> )-Norreticuline<br>Dimethoxytetrahydroisoquinoline (±)-Pavine<br>( <i>S</i> )-Scoulerine                                                                                           | 2' <i>N</i>               | Cellular localization of transcripts correlates with known BIA genes in berberine accumulating organs                              | Samanani <i>et al.</i> , 2005;<br>Liscombe <i>et al.</i> , 2009 |
|                                 | TfPavNMT                      | Pavine <i>N</i> -methyltransferase                                     | EU883010   | ( <i>S</i> )-Reticuline (±)-Pavine<br>( <i>R,S</i> )-Stylopine<br>( <i>S</i> )-Scoulerine                                                                                                       | 2' <i>N</i> , 3' <i>N</i> |                                                                                                                                    | Liscombe <i>et al.</i> , 2009;<br>Torres <i>et al.</i> , 2016   |
| <i>Papaver bracteatum</i>       | PbTNMT                        | Tetrahydroprotoberberine <i>N</i> -methyltransferase                   | EU882994   | ( <i>R,S</i> )-Tetrahydropalmatine<br>( <i>R,S</i> )-Stylopine                                                                                                                                  |                           | Transcript expression induced by elicitor treatment of cell culture                                                                | Liscombe <i>et al.</i> , 2009                                   |
| <i>Psychotria ipecacuanha</i>   | IpeOMT1                       |                                                                        | AB527082   | ( <i>R,S</i> )-Isococlaurine<br>( <i>R,S</i> )-Norcoclaurine<br>( <i>R,S</i> )-Norprotosinomenine<br>( <i>R,S</i> )-Nororientaline                                                              | 6, 4'                     | Not involved in BIA biosynthesis                                                                                                   | Nomura & Kutchan, 2010                                          |
|                                 | IpeOMT2                       |                                                                        | AB527083   | Oripavine                                                                                                                                                                                       | 3                         | Not involved in BIA biosynthesis                                                                                                   | Nomura & Kutchan, 2010                                          |
|                                 | IpeOMT3                       |                                                                        | AB527084   | ( <i>S</i> )-Norreticuline<br>( <i>R,S</i> )-Nororientaline<br>( <i>S</i> )-Coclaurine                                                                                                          | 7<br>5 only               | Not involved in BIA biosynthesis                                                                                                   | Nomura & Kutchan, 2010                                          |
| <i>Thalictrum tuberosom</i>     | TtOMTII;1                     |                                                                        | AF064693   | ( <i>R,S</i> )-Laudanosoline<br>( <i>R,S</i> )-3'- <i>O</i> -Methylnorlaudanoline<br>( <i>R,S</i> )-4'- <i>O</i> -Methylnorlaudanoline<br>( <i>R,S</i> )-3- <i>O</i> -Desmethylcheilanthifoline |                           | Not involved in BIA biosynthesis                                                                                                   | Frick & Kutchan, 1999                                           |
|                                 | TtOMTII;2                     |                                                                        | AF064694   | ( <i>S</i> )-Norcoclaurine<br>( <i>R,S</i> )-4'- <i>O</i> -Methylnorlaudanoline                                                                                                                 |                           | Not involved in BIA biosynthesis                                                                                                   | Frick & Kutchan, 1999                                           |
|                                 | TtOMTII;3                     |                                                                        | AF064695   | ( <i>R,S</i> )-Norisoorientaline                                                                                                                                                                |                           | Not involved in BIA biosynthesis                                                                                                   | Frick & Kutchan, 1999                                           |
|                                 | TtOMTII;4                     |                                                                        | AF064696   | ( <i>R,S</i> )-Norisoorientaline                                                                                                                                                                |                           | Not involved in BIA biosynthesis                                                                                                   | Frick & Kutchan, 1999                                           |
|                                 | Heterologous dimers (various) |                                                                        |            | Many                                                                                                                                                                                            |                           |                                                                                                                                    | Frick & Kutchan, 1999                                           |
| <i>Ephedra sinica</i>           | EsPaNMT                       | Phenylalkylamine <i>N</i> -methyltransferase                           | MH029305   | ( <i>S</i> )-Coclaurine<br>( <i>S</i> )-Reticuline<br>( <i>R,S</i> )-Stylopine                                                                                                                  |                           | Not involved in BIA biosynthesis                                                                                                   | Morris <i>et al.</i> , 2018                                     |
| <i>Dactylicapnos scandens</i>   | DsC7OMT                       | Corytuberine 7- <i>O</i> -methyltransferase                            |            | ( <i>S</i> )-Corytuberine                                                                                                                                                                       | 7                         |                                                                                                                                    | He <i>et al.</i> , 2017                                         |

**Supplementary Table 1 (continued)**

- Fossati, E., Ekins, A., Narcross, L., Zhu, Y., Falguyret, J.-P., Beaudoin, G. A. W., et al. (2014). Reconstitution of a 10-gene pathway for synthesis of the plant alkaloid dihydrosanguinarine in *Saccharomyces cerevisiae*. *Nat. Commun.* 5, 3283. doi:10.1038/ncomms4283.
- Hagel, J. M., Mandal, R., Han, B., Han, J., Dinsmore, D. R., Borchers, C. H., et al. (2015). Metabolome analysis of 20 taxonomically related benzyloquinoline alkaloid-producing plants. *BMC Plant Biol.* 15, 220. doi:10.1186/s12870-015-0594-2.
